# Supplementary material for: Identification of the nitrogen species on N-doped graphene layers and Pt/NG composite catalyst for direct methanol fuel cell
Source: Royal Society of Chemistry journal article supplement (doi:10.1039/c0cp00789g), 2010-01-01
Supplement: c0cp00789g.pdf [file c0cp00789g.pdf]

# Identification of the nitrogen species on N-doped graphene layers and Pt/NG composite catalyst for direct methanol fuel cell

*Le-Sheng Zhang<sup>a</sup>, Xian-Qing Liang<sup>b</sup>, Wei-Guo Song<sup>\*a</sup>, and Zi-Yu, Wu<sup>\*b</sup>*

<sup>a</sup>Beijing National Laboratory for Molecular Sciences (BNLMS) &  
Institute of Chemistry, Chinese Academy of Sciences, Beijing, 100190,  
P. R. China

<sup>b</sup>National Synchrotron Radiation Laboratory, University of Science &  
Technology of China, Hefei, 230029, P. R. China.

<sup>c</sup>Institute of High Energy Physics, Chinese Academy of Sciences,  
Beijing, 100049, P. R. China.

E-mail: [wsong@iccas.ac.cn](mailto:wsong@iccas.ac.cn), [wuzy@ihep.ac.cn](mailto:wuzy@ihep.ac.cn)

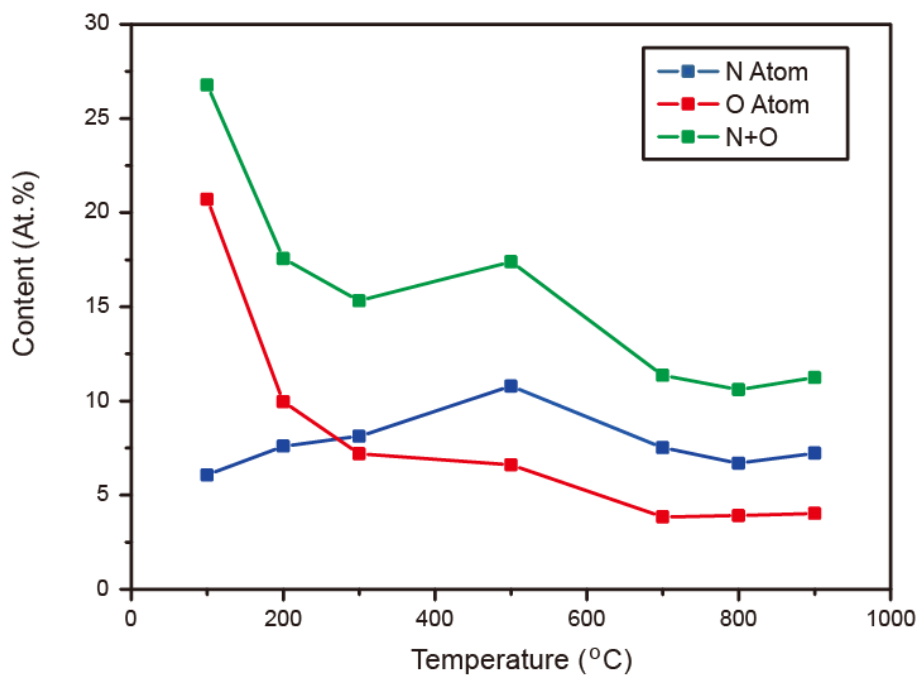

Figure S1 Change of the content of the doped nitrogen and oxygen in atom ration in NG samples.

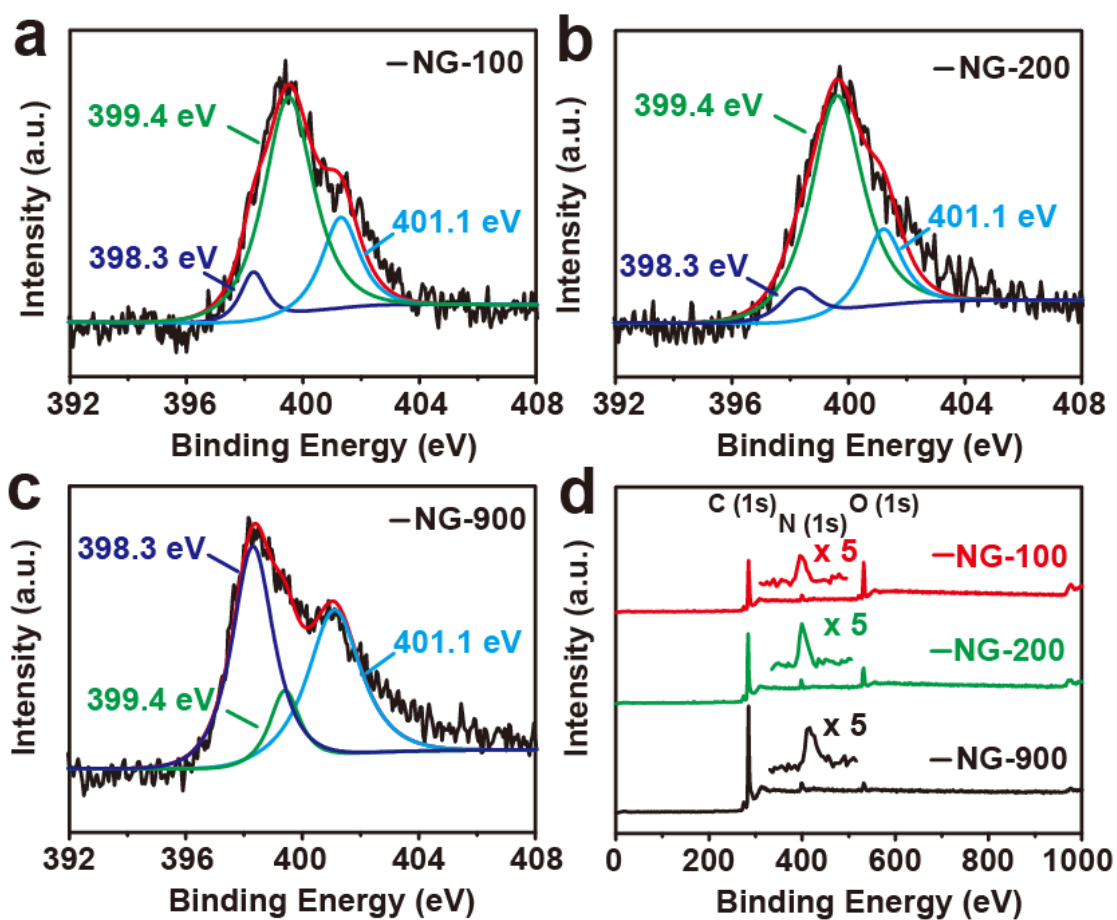

Figure S2 (a), (b) and (c) N 1s XPS of NG-100, NG-200 and NG-900; (d) Full range XPS of  
NG-100, NG-200 and NG-900

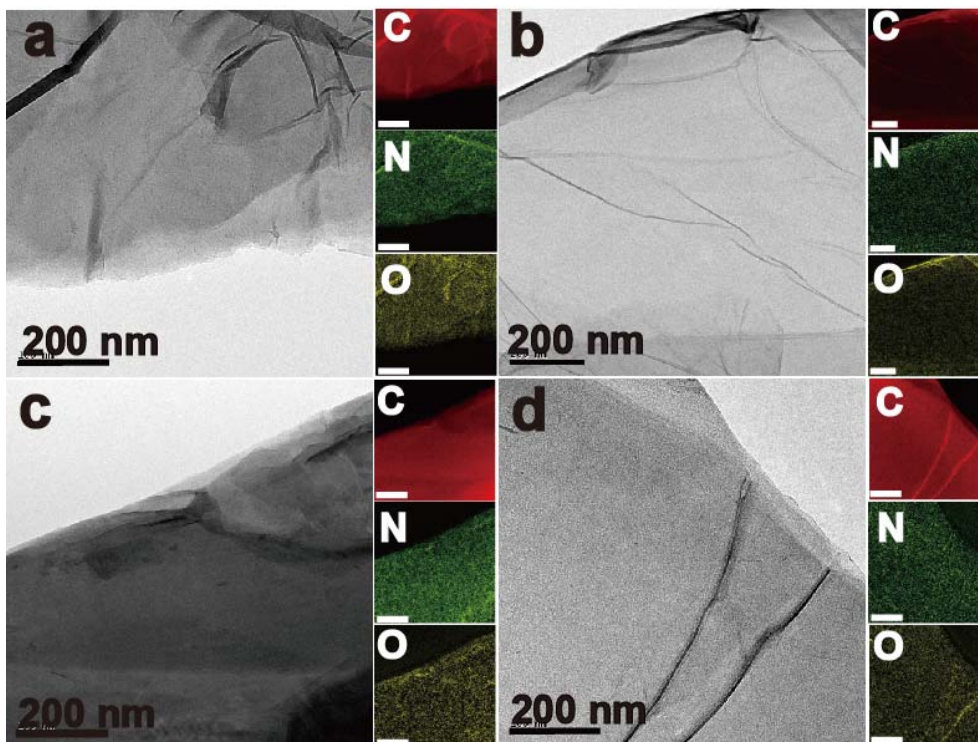

Figure S3 (a), (b), (c) and (d) TEM and EELS graphs of NG-300, NG-500, NG-700 and NG-900,  
respectively. All scale bars are 200 nm

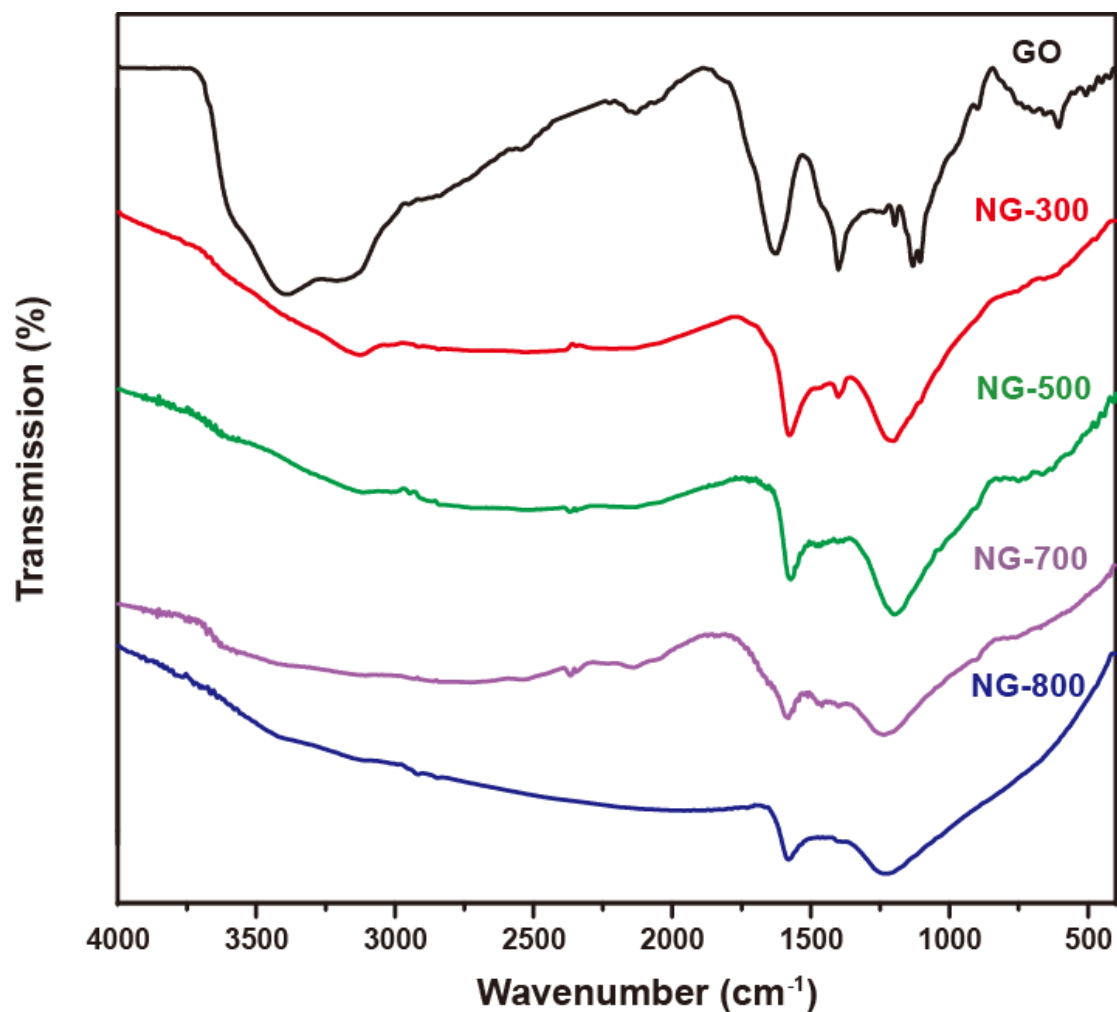

Figure S4 FTIR spectra of GO, NG-300, NG-500, NG-700 and NG-800, from top to bottom

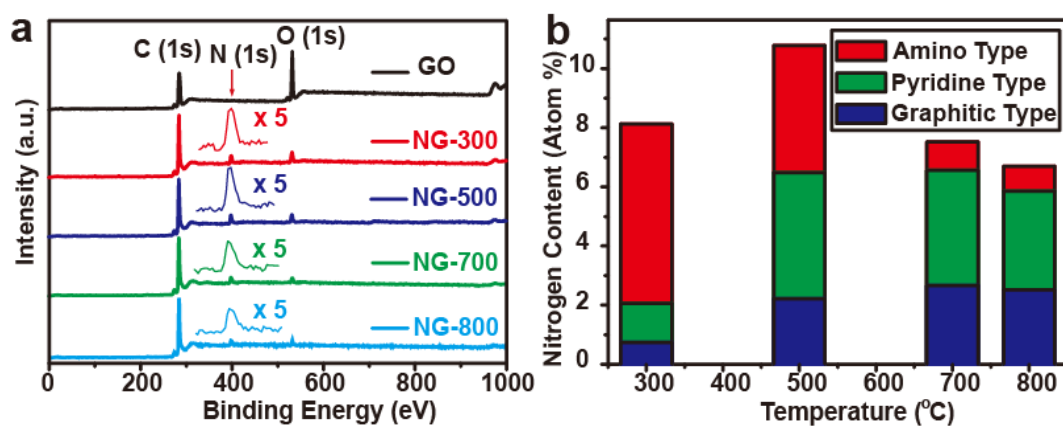

Figure S5 (a) XPS spectra of GO, NG-300, NG-500, NG-700 and NG-800. (b) Content of different nitrogen species in four N-doped samples.

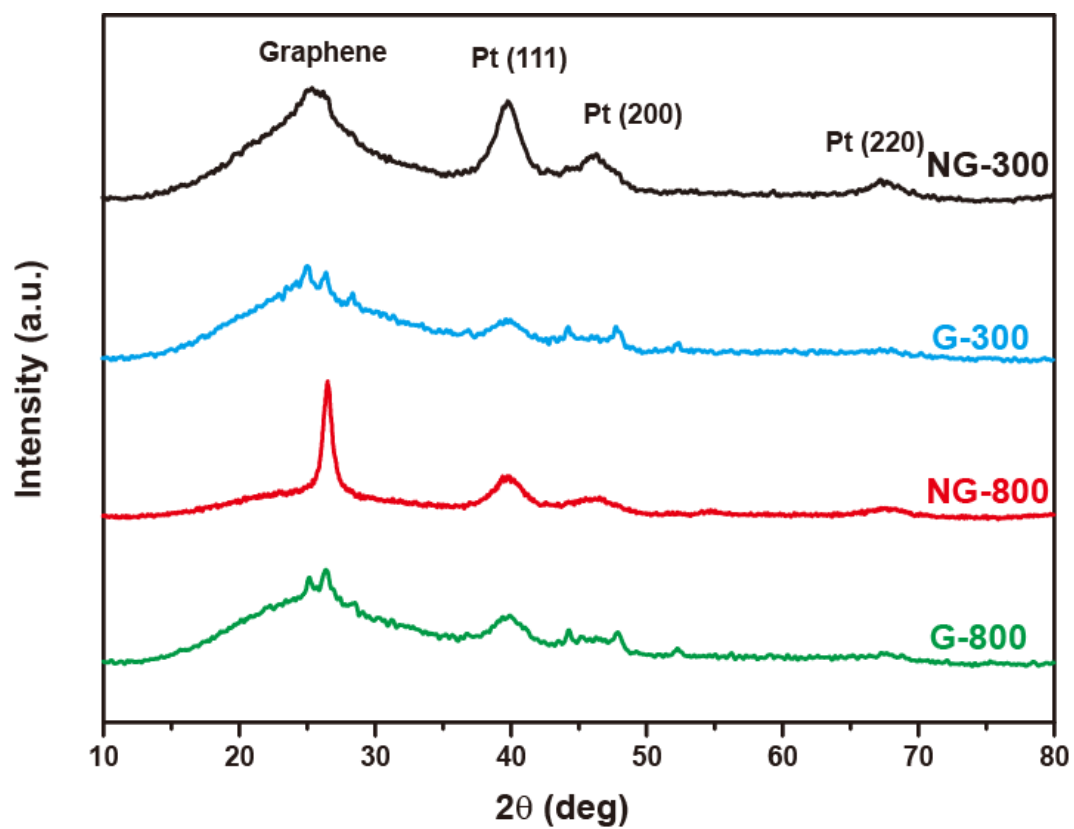

Figure S6 XRD spectra of NG-300, G-300, NG-800 and G-800

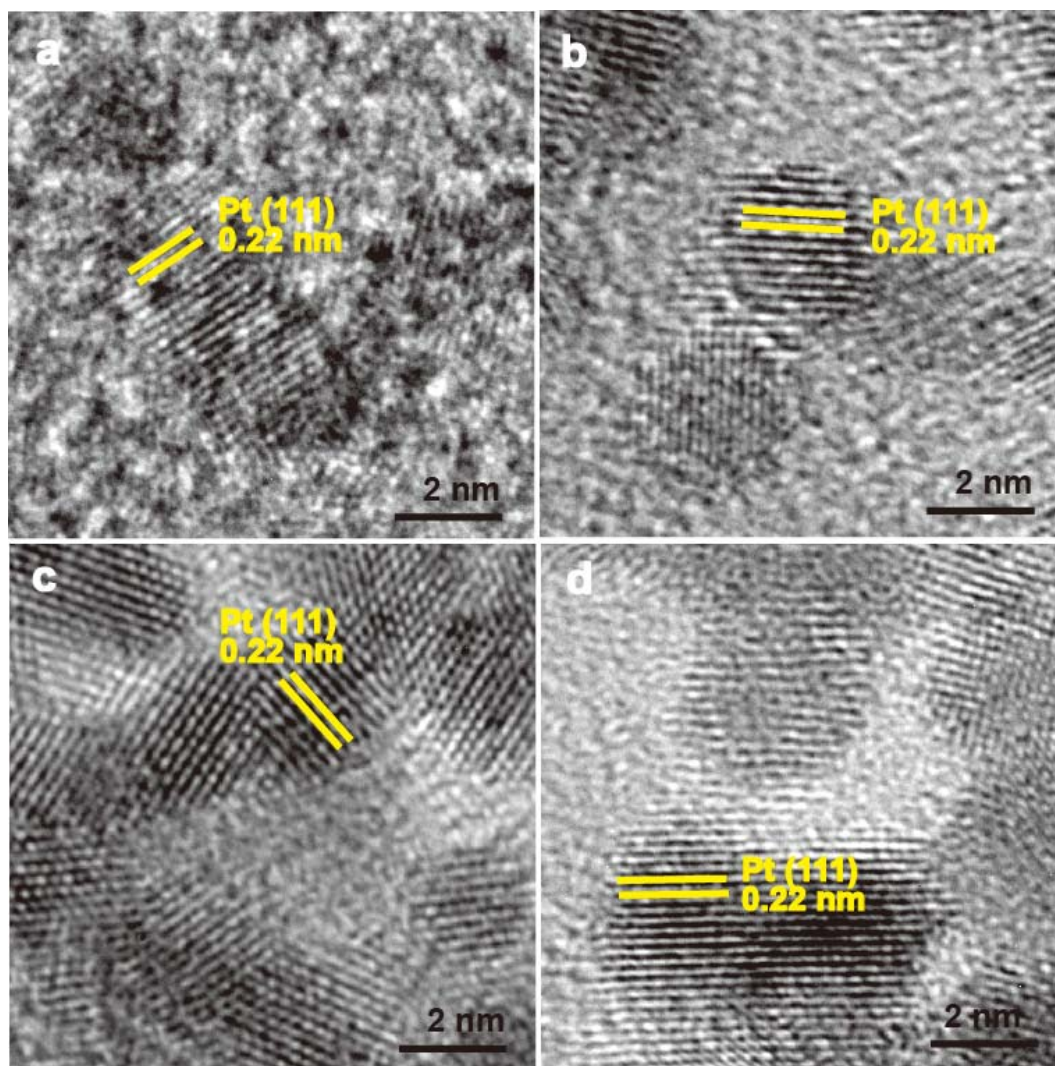

Figure S7 High resolution TEM image of (a) Pt/NG-300, (b) Pt/G-300, (c) Pt/NG-800, and (d) Pt/G-800.

Table S1 Resistance of NG-300, NG-800, G-300 and G-800

| Samples | Resistance (logR) |
|---------|-------------------|
| NG-300  | 3.06              |
| NG-800  | 2.42              |
| G-300   | 3.21              |
| G-800   | 2.89              |
